# Supplementary material for: Lignin cationization for the removal of phosphates and nitrates from effluents of wastewater treatment plants
Source: Royal Society of Chemistry journal article supplement (doi:10.1039/d4va00312h), 2024-01-01
Supplement: d4va00312h1.pdf [file d4va00312h1.pdf]

**Lignin cationization for the removal of phosphates and nitrates from effluents of wastewater treatment plants**

Supplementary material (S):

**S1: Phosphate kinetics data**

| Time<br>(mins) | Absorbance @880 nm |      |      |      |      |      |      |      |      | Final Conc.<br>(mg/mL) |      |      | Ave<br>Conc | Qt<br>(mg/g) | t/qt   | ln(qe-qt) | Removal<br>% |
|----------------|--------------------|------|------|------|------|------|------|------|------|------------------------|------|------|-------------|--------------|--------|-----------|--------------|
|                | I                  | II   |      |      | III  |      |      | I    | II   | III                    |      |      |             |              |        |           |              |
| <b>0.00</b>    | 0.54               | 0.51 | 0.52 | 0.54 | 0.51 | 0.52 | 0.54 | 0.51 | 0.52 | 0.61                   | 0.61 | 0.61 | 0.61        | 0.00         | 0.00   | -1.41     | 0.00         |
| <b>1.00</b>    | 0.16               | 0.21 | 0.19 | 0.21 | 0.22 | 0.21 | 0.22 | 0.21 | 0.18 | 0.20                   | 0.23 | 0.21 | 0.21        | 0.20         | 5.09   | -3.02     | 64.85        |
| <b>2.50</b>    | 0.20               | 0.21 | 0.21 | 0.21 | 0.21 | 0.22 | 0.21 | 0.21 | 0.19 | 0.22                   | 0.23 | 0.21 | 0.22        | 0.19         | 12.90  | -2.97     | 63.90        |
| <b>5.00</b>    | 0.18               | 0.21 | 0.20 | 0.22 | 0.23 | 0.20 | 0.21 | 0.20 | 0.22 | 0.20                   | 0.23 | 0.22 | 0.22        | 0.19         | 25.90  | -2.95     | 63.68        |
| <b>10.00</b>   | 0.21               | 0.25 | 0.26 | 0.27 | 0.28 | 0.25 | 0.19 | 0.20 | 0.17 | 0.26                   | 0.29 | 0.19 | 0.25        | 0.18         | 55.71  | -2.72     | 59.20        |
| <b>20.00</b>   | 0.19               | 0.19 | 0.16 | 0.17 | 0.17 | 0.18 | 0.17 | 0.20 | 0.18 | 0.19                   | 0.18 | 0.19 | 0.18        | 0.21         | 94.81  | -3.37     | 69.58        |
| <b>30.00</b>   | 0.18               | 0.19 | 0.18 | 0.20 | 0.18 | 0.18 | 0.18 | 0.18 | 0.16 | 0.19                   | 0.19 | 0.18 | 0.19        | 0.21         | 143.00 | -3.34     | 69.19        |
| <b>40.00</b>   | 0.18               | 0.13 | 0.17 | 0.18 | 0.18 | 0.14 | 0.21 | 0.20 | 0.22 | 0.16                   | 0.17 | 0.22 | 0.18        | 0.21         | 188.57 | -3.41     | 69.96        |
| <b>50.00</b>   | 0.17               | 0.18 | 0.17 | 0.18 | 0.18 | 0.16 | 0.17 | 0.17 | 0.17 | 0.18                   | 0.18 | 0.18 | 0.18        | 0.21         | 232.85 | -3.49     | 70.82        |
| <b>60.00</b>   | 0.19               | 0.18 | 0.17 | 0.19 | 0.20 | 0.18 | 0.22 | 0.19 | 0.18 | 0.19                   | 0.20 | 0.21 | 0.20        | 0.21         | 292.30 | -3.22     | 67.70        |
| <b>70.00</b>   | 0.18               | 0.18 | 0.16 | 0.19 | 0.19 | 0.19 | 0.19 | 0.19 | 0.16 | 0.18                   | 0.20 | 0.18 | 0.19        | 0.21         | 333.66 | -3.34     | 69.19        |
| <b>80.00</b>   | 0.22               | 0.18 | 0.17 | 0.19 | 0.18 | 0.18 | 0.16 | 0.18 | 0.16 | 0.20                   | 0.19 | 0.17 | 0.19        | 0.21         | 381.33 | -3.34     | 69.19        |
| <b>90.00</b>   | 0.16               | 0.16 | 0.15 | 0.15 | 0.16 | 0.16 | 0.16 | 0.16 | 0.16 | 0.16                   | 0.16 | 0.16 | 0.16        | 0.22         | 402.94 | -3.82     | 73.67        |

**S2: Phosphate isotherms data**

| Ci<br>(ppm) | Absorbance @ 880 nm |      |      |      |      |      |      |      | Conc (ppm) |      |      | qt (mg/g) |      |      |      |
|-------------|---------------------|------|------|------|------|------|------|------|------------|------|------|-----------|------|------|------|
|             | I                   | II   | III  | I    | II   | III  | I    | II   | III        | I    | II   | III       |      |      |      |
| 1           | 0.3                 | 0.28 | 0.27 | 0.34 | 0.34 | 0.25 | 0.39 | 0.39 | 0.29       | 0.31 | 0.35 | 0.4       | 0.34 | 0.32 | 0.3  |
| 0.9         | 0.34                | 0.34 | 0.29 | 0.29 | 0.31 | 0.27 | 0.35 | 0.36 | 0.26       | 0.36 | 0.32 | 0.37      | 0.27 | 0.29 | 0.27 |
| 0.8         | 0.23                | 0.23 | 0.23 | 0.3  | 0.31 | 0.28 | 0.23 | 0.23 | 0.19       | 0.25 | 0.33 | 0.23      | 0.27 | 0.24 | 0.28 |
| 0.7         | 0.19                | 0.21 | 0.22 | 0.23 | 0.24 | 0.23 | 0.2  | 0.22 | 0.21       | 0.22 | 0.25 | 0.22      | 0.24 | 0.23 | 0.24 |
| 0.6         | 0.18                | 0.18 | 0.18 | 0.18 | 0.18 | 0.19 | 0.18 | 0.19 | 0.17       | 0.19 | 0.19 | 0.19      | 0.21 | 0.21 | 0.21 |
| 0.5         | 0.15                | 0.15 | 0.13 | 0.15 | 0.14 | 0.16 | 0.16 | 0.16 | 0.15       | 0.14 | 0.15 | 0.15      | 0.18 | 0.17 | 0.17 |

  

| Ci<br>(ppm) | Ce<br>(ppm) | 1/Ce | Log<br>Ce | Ln<br>Ce | qe<br>(mg/g) | 1/qe | Log<br>qe | Ce/qe |
|-------------|-------------|------|-----------|----------|--------------|------|-----------|-------|
| 1           | 0.36        | 2.81 | -0.45     | -1.03    | 0.32         | 3.1  | -0.49     | 1.1   |
| 0.9         | 0.35        | 2.86 | -0.46     | -1.05    | 0.27         | 3.64 | -0.56     | 1.27  |
| 0.8         | 0.27        | 3.7  | -0.57     | -1.31    | 0.26         | 3.78 | -0.58     | 1.02  |
| 0.7         | 0.23        | 4.34 | -0.64     | -1.47    | 0.23         | 4.26 | -0.63     | 0.98  |
| 0.6         | 0.19        | 5.36 | -0.73     | -1.68    | 0.21         | 4.84 | -0.68     | 0.9   |
| 0.5         | 0.15        | 6.79 | -0.83     | -1.92    | 0.18         | 5.67 | -0.75     | 0.83  |

**S3: Doehlert's matrix design for Phosphates**

| Exp # | Ads dose (mg/mL) | Ci (ppm) | Time (min) | Absorbance @ 880 nm @ filter |      |      |      |      |      | Absorbance @ t=0 |      |      |  |
|-------|------------------|----------|------------|------------------------------|------|------|------|------|------|------------------|------|------|--|
|       |                  |          |            | I                            |      | II   |      | I    |      | II               |      |      |  |
| 1.00  | 6.00             | 50.25    | 25.00      | 0.49                         | 0.49 | 0.48 | 0.50 | 0.50 | 0.51 | 0.54             | 0.55 | 0.55 |  |
| 2.00  | 10.00            | 50.25    | 25.00      | 0.42                         | 0.42 | 0.42 | 0.42 | 0.43 | 0.43 | 0.54             | 0.57 | 0.55 |  |
| 3.00  | 2.00             | 50.25    | 25.00      | 0.44                         | 0.54 | 0.55 | 0.54 | 0.49 | 0.54 | 0.52             | 0.56 | 0.54 |  |
| 4.00  | 8.00             | 100.00   | 25.00      | 0.49                         | 0.48 | 0.51 | 0.50 | 0.50 | 0.50 | 0.55             | 0.55 | 0.55 |  |
| 5.00  | 4.00             | 0.50     | 25.00      | 0.11                         | 0.12 | 0.12 | 0.13 | 0.13 | 0.12 | 0.56             | 0.56 | 0.55 |  |
| 6.00  | 8.00             | 0.50     | 25.00      | 0.09                         | 0.10 | 0.10 | 0.07 | 0.07 | 0.07 | 0.54             | 0.55 | 0.55 |  |
| 7.00  | 4.00             | 100.00   | 25.00      | 0.54                         | 0.56 | 0.56 | 0.56 | 0.55 | 0.54 | 0.55             | 0.56 | 0.55 |  |

| Exp # | Ads dose (mg/mL) | Final conc (ppm) |      |      | qt (mg/g) |      | Removal % |       | Ave   | STD  |
|-------|------------------|------------------|------|------|-----------|------|-----------|-------|-------|------|
|       |                  | Zeros            | I    | II   | I         | II   | I         | II    |       |      |
| 1.00  | 6.00             | 0.64             | 0.56 | 0.58 | 3.84      | 2.77 | 11.98     | 8.63  | 10.30 | 2.37 |
| 2.00  | 10.00            | 0.65             | 0.48 | 0.49 | 8.32      | 7.89 | 25.60     | 24.27 | 24.93 | 0.94 |
| 3.00  | 2.00             | 0.63             | 0.59 | 0.61 | 1.86      | 1.16 | 5.86      | 3.65  | 4.76  | 1.57 |
| 4.00  | 8.00             | 0.64             | 0.57 | 0.58 | 6.66      | 6.50 | 10.38     | 10.13 | 10.26 | 0.18 |
| 5.00  | 4.00             | 0.65             | 0.11 | 0.11 | 0.27      | 0.27 | 83.45     | 82.37 | 82.91 | 0.76 |
| 6.00  | 8.00             | 0.64             | 0.08 | 0.05 | 0.28      | 0.29 | 87.74     | 92.38 | 90.06 | 3.28 |
| 7.00  | 4.00             | 0.65             | 0.64 | 0.64 | 0.74      | 0.45 | 1.14      | 0.70  | 0.92  | 0.31 |

**S4: Nitrates Kinetics data**

| Time<br>(mins) | Final Conc.(mg/L) |      |      | Ave Conc.<br>(mg/mL) | Qt<br>(mg/g) | t/qt   | ln(qe-qt) | NO <sub>3</sub> Removal % |       |       |
|----------------|-------------------|------|------|----------------------|--------------|--------|-----------|---------------------------|-------|-------|
|                | I                 | II   | III  |                      |              |        |           |                           |       |       |
| <b>0.00</b>    | 5.50              | 5.50 | 5.50 | 5.50                 | 0.00         | 0.00   | -0.20     | 0.00                      | 0.00  | 0.00  |
| <b>1.00</b>    | 4.00              | 4.90 | 4.90 | 4.60                 | 0.45         | 2.22   | -1.00     | 16.36                     | 27.27 | 10.91 |
| <b>2.50</b>    | 3.80              | 4.60 | 4.60 | 4.33                 | 0.58         | 4.29   | -1.46     | 21.21                     | 30.91 | 16.36 |
| <b>5.00</b>    | 4.10              | 4.50 | 5.10 | 4.57                 | 0.47         | 10.71  | -1.05     | 16.97                     | 25.45 | 18.18 |
| <b>10.00</b>   | 4.10              | 4.60 | 4.80 | 4.50                 | 0.50         | 20.00  | -1.15     | 18.18                     | 25.45 | 16.36 |
| <b>20.00</b>   | 4.20              | 4.60 | 4.50 | 4.43                 | 0.53         | 37.50  | -1.26     | 19.39                     | 23.64 | 16.36 |
| <b>30.00</b>   | 4.10              | 4.40 | 4.70 | 4.40                 | 0.55         | 54.55  | -1.32     | 20.00                     | 25.45 | 20.00 |
| <b>40.00</b>   | 4.30              | 4.60 | 4.20 | 4.37                 | 0.57         | 70.59  | -1.39     | 20.61                     | 21.82 | 16.36 |
| <b>50.00</b>   | 4.30              | 4.70 | 4.10 | 4.37                 | 0.57         | 88.24  | -1.39     | 20.61                     | 21.82 | 14.55 |
| <b>60.00</b>   | 3.50              | 4.40 | 4.30 | 4.07                 | 0.72         | 83.72  | -2.30     | 26.06                     | 36.36 | 20.00 |
| <b>70.00</b>   | 3.10              | 4.40 | 4.40 | 3.97                 | 0.77         | 91.30  | -3.00     | 27.88                     | 43.64 | 20.00 |
| <b>80.00</b>   | 4.20              | 3.70 | 4.20 | 4.03                 | 0.73         | 109.09 | -2.48     | 26.67                     | 23.64 | 32.73 |
| <b>90.00</b>   | 3.90              | 4.10 | 4.60 | 4.20                 | 0.65         | 138.46 | -1.79     | 23.64                     | 29.09 | 25.45 |

**S5: Nitrates isotherm data**

| Ci<br>(ppm)  | Conc (mg/L) |       |       | qt (mg/g) |      |      | Ce<br>(ppm) | 1/Ce | Log Ce | Ln Ce | qe<br>(mg/g) | 1/qe | Log qe | Ce/qe |
|--------------|-------------|-------|-------|-----------|------|------|-------------|------|--------|-------|--------------|------|--------|-------|
|              | I           | II    | III   | I         | II   | III  |             |      |        |       |              |      |        |       |
| <b>15.80</b> | 14.20       | 13.60 | 14.00 | 0.80      | 1.10 | 0.90 | 13.93       | 0.07 | 1.14   | 2.63  | 0.93         | 1.07 | -0.03  | 14.93 |
| <b>13.80</b> | 12.10       | 11.70 | 12.30 | 0.85      | 1.05 | 0.75 | 12.03       | 0.08 | 1.08   | 2.49  | 0.88         | 1.13 | -0.05  | 13.62 |
| <b>11.60</b> | 9.60        | 9.50  | 10.10 | 1.00      | 1.05 | 0.75 | 9.73        | 0.10 | 0.99   | 2.28  | 0.93         | 1.07 | -0.03  | 10.43 |
| <b>7.30</b>  | 5.90        | 5.90  | 5.70  | 0.70      | 0.70 | 0.80 | 5.83        | 0.17 | 0.77   | 1.76  | 0.73         | 1.36 | -0.13  | 7.95  |
| <b>5.50</b>  | 4.50        | 4.10  | 3.80  | 0.50      | 0.70 | 0.85 | 4.13        | 0.24 | 0.62   | 1.42  | 0.68         | 1.46 | -0.17  | 6.05  |
| <b>3.60</b>  | 2.80        | 2.90  | 3.00  | 0.40      | 0.35 | 0.30 | 2.90        | 0.34 | 0.46   | 1.06  | 0.35         | 2.86 | -0.46  | 8.29  |

**S6: Doehlert's matrix design for Nitrates**

| Adsorbent<br>dose (mg/L) | Ci<br>(mg/L) | Time<br>(min) | Final conc (mg/L) |       | Removal % |       | Av.<br>removal % | STD  |
|--------------------------|--------------|---------------|-------------------|-------|-----------|-------|------------------|------|
|                          |              |               | I                 | II    | I         | II    |                  |      |
| <b>6.00</b>              | 13.55        | 25.00         | 9.50              | 8.90  | 29.89     | 34.32 | 32.10            | 3.13 |
| <b>10.00</b>             | 13.55        | 25.00         | 7.20              | 5.70  | 46.86     | 57.93 | 52.40            | 7.83 |
| <b>2.00</b>              | 13.55        | 25.00         | 12.00             | 11.50 | 11.44     | 15.13 | 13.28            | 2.61 |
| <b>8.00</b>              | 24.10        | 25.00         | 16.70             | 17.80 | 30.71     | 26.14 | 28.42            | 3.23 |
| <b>4.00</b>              | 3.00         | 25.00         | 1.90              | 2.00  | 36.67     | 33.33 | 35.00            | 2.36 |
| <b>8.00</b>              | 3.00         | 25.00         | 0.60              | 0.80  | 80.00     | 73.33 | 76.67            | 4.71 |
| <b>4.00</b>              | 24.10        | 25.00         | 19.30             | 18.40 | 19.92     | 23.65 | 21.78            | 2.64 |

**S7: Doehlert's model data for phosphates and nitrates**

| Adsorbent dose (mg/mL) | Phosphate conc (mg/L) | Phosphate removal % | Nitrate conc (mg/L) | Nitrate removal % |
|------------------------|-----------------------|---------------------|---------------------|-------------------|
| 2.00                   | 0.50                  | 81.51               | 3.00                | 17.78             |
| 2.00                   | 10.45                 | 60.75               | 5.11                | 15.27             |
| 2.00                   | 20.40                 | 42.75               | 7.22                | 13.41             |
| 2.00                   | 30.35                 | 27.52               | 9.33                | 12.20             |
| 2.00                   | 40.30                 | 15.06               | 11.44               | 11.65             |
| 2.00                   | 50.25                 | 5.37                | 13.55               | 11.75             |
| 2.00                   | 60.20                 | -1.55               | 15.66               | 12.51             |
| 2.00                   | 70.15                 | -5.71               | 17.77               | 13.92             |
| 2.00                   | 80.10                 | -7.10               | 19.88               | 15.99             |
| 2.00                   | 90.05                 | -5.72               | 21.99               | 18.71             |
| 2.00                   | 100.00                | -1.57               | 24.10               | 22.08             |
| 2.80                   | 0.50                  | 81.55               | 3.00                | 25.24             |
| 2.80                   | 10.45                 | 60.83               | 5.11                | 22.02             |
| 2.80                   | 20.40                 | 42.88               | 7.22                | 19.46             |
| 2.80                   | 30.35                 | 27.70               | 9.33                | 17.55             |
| 2.80                   | 40.30                 | 15.28               | 11.44               | 16.30             |
| 2.80                   | 50.25                 | 5.63                | 13.55               | 15.70             |
| 2.80                   | 60.20                 | -1.25               | 15.66               | 15.76             |
| 2.80                   | 70.15                 | -5.36               | 17.77               | 16.47             |
| 2.80                   | 80.10                 | -6.71               | 19.88               | 17.84             |
| 2.80                   | 90.05                 | -5.28               | 21.99               | 19.86             |
| 2.80                   | 100.00                | -1.09               | 24.10               | 22.53             |
| 3.60                   | 0.50                  | 81.96               | 3.00                | 32.75             |
| 3.60                   | 10.45                 | 61.28               | 5.11                | 28.84             |
| 3.60                   | 20.40                 | 43.37               | 7.22                | 25.57             |
| 3.60                   | 30.35                 | 28.23               | 9.33                | 22.97             |
| 3.60                   | 40.30                 | 15.86               | 11.44               | 21.01             |

|      |        |       |       |       |
|------|--------|-------|-------|-------|
| 3.60 | 50.25  | 6.25  | 13.55 | 19.72 |
| 3.60 | 60.20  | -0.58 | 15.66 | 19.07 |
| 3.60 | 70.15  | -4.65 | 17.77 | 19.08 |
| 3.60 | 80.10  | -5.95 | 19.88 | 19.75 |
| 3.60 | 90.05  | -4.49 | 21.99 | 21.07 |
| 3.60 | 100.00 | -0.25 | 24.10 | 23.04 |
| 4.40 | 0.50   | 82.73 | 3.00  | 40.33 |
| 4.40 | 10.45  | 62.09 | 5.11  | 35.71 |
| 4.40 | 20.40  | 44.23 | 7.22  | 31.75 |
| 4.40 | 30.35  | 29.13 | 9.33  | 28.44 |
| 4.40 | 40.30  | 16.80 | 11.44 | 25.78 |
| 4.40 | 50.25  | 7.24  | 13.55 | 23.79 |
| 4.40 | 60.20  | 0.45  | 15.66 | 22.44 |
| 4.40 | 70.15  | -3.58 | 17.77 | 21.75 |
| 4.40 | 80.10  | -4.84 | 19.88 | 21.72 |
| 4.40 | 90.05  | -3.33 | 21.99 | 22.33 |
| 4.40 | 100.00 | 0.95  | 24.10 | 23.61 |
| 5.20 | 0.50   | 83.86 | 3.00  | 47.96 |
| 5.20 | 10.45  | 63.27 | 5.11  | 42.64 |
| 5.20 | 20.40  | 45.45 | 7.22  | 37.98 |
| 5.20 | 30.35  | 30.39 | 9.33  | 33.97 |
| 5.20 | 40.30  | 18.11 | 11.44 | 30.61 |
| 5.20 | 50.25  | 8.59  | 13.55 | 27.92 |
| 5.20 | 60.20  | 1.84  | 15.66 | 25.87 |
| 5.20 | 70.15  | -2.14 | 17.77 | 24.48 |
| 5.20 | 80.10  | -3.36 | 19.88 | 23.74 |
| 5.20 | 90.05  | -1.80 | 21.99 | 23.66 |
| 5.20 | 100.00 | 2.52  | 24.10 | 24.23 |
| 6.00 | 0.50   | 85.35 | 3.00  | 55.65 |
| 6.00 | 10.45  | 64.81 | 5.11  | 49.63 |
| 6.00 | 20.40  | 47.03 | 7.22  | 44.27 |
| 6.00 | 30.35  | 32.02 | 9.33  | 39.56 |

|      |        |       |       |       |
|------|--------|-------|-------|-------|
| 6.00 | 40.30  | 19.78 | 11.44 | 35.50 |
| 6.00 | 50.25  | 10.30 | 13.55 | 32.10 |
| 6.00 | 60.20  | 3.60  | 15.66 | 29.36 |
| 6.00 | 70.15  | -0.34 | 17.77 | 27.27 |
| 6.00 | 80.10  | -1.51 | 19.88 | 25.83 |
| 6.00 | 90.05  | 0.09  | 21.99 | 25.05 |
| 6.00 | 100.00 | 4.45  | 24.10 | 24.92 |
| 6.80 | 0.50   | 87.21 | 3.00  | 63.40 |
| 6.80 | 10.45  | 66.71 | 5.11  | 56.68 |
| 6.80 | 20.40  | 48.97 | 7.22  | 50.62 |
| 6.80 | 30.35  | 34.01 | 9.33  | 45.21 |
| 6.80 | 40.30  | 21.81 | 11.44 | 40.45 |
| 6.80 | 50.25  | 12.38 | 13.55 | 36.35 |
| 6.80 | 60.20  | 5.72  | 15.66 | 32.90 |
| 6.80 | 70.15  | 1.82  | 17.77 | 30.11 |
| 6.80 | 80.10  | 0.70  | 19.88 | 27.98 |
| 6.80 | 90.05  | 2.34  | 21.99 | 26.49 |
| 6.80 | 100.00 | 6.75  | 24.10 | 25.66 |
| 7.60 | 0.50   | 89.43 | 3.00  | 71.21 |
| 7.60 | 10.45  | 68.97 | 5.11  | 63.79 |
| 7.60 | 20.40  | 51.28 | 7.22  | 57.02 |
| 7.60 | 30.35  | 36.36 | 9.33  | 50.91 |
| 7.60 | 40.30  | 24.20 | 11.44 | 45.46 |
| 7.60 | 50.25  | 14.82 | 13.55 | 40.66 |
| 7.60 | 60.20  | 8.20  | 15.66 | 36.51 |
| 7.60 | 70.15  | 4.35  | 17.77 | 33.02 |
| 7.60 | 80.10  | 3.27  | 19.88 | 30.18 |
| 7.60 | 90.05  | 4.95  | 21.99 | 28.00 |
| 7.60 | 100.00 | 9.41  | 24.10 | 26.47 |
| 8.40 | 0.50   | 92.02 | 3.00  | 79.08 |
| 8.40 | 10.45  | 71.60 | 5.11  | 70.96 |
| 8.40 | 20.40  | 53.95 | 7.22  | 63.49 |



|       |        |       |       |       |
|-------|--------|-------|-------|-------|
| 8.40  | 30.35  | 39.08 | 9.33  | 56.68 |
| 8.40  | 40.30  | 26.96 | 11.44 | 50.52 |
| 8.40  | 50.25  | 17.62 | 13.55 | 45.02 |
| 8.40  | 60.20  | 11.05 | 15.66 | 40.18 |
| 8.40  | 70.15  | 7.24  | 17.77 | 35.98 |
| 8.40  | 80.10  | 6.20  | 19.88 | 32.44 |
| 8.40  | 90.05  | 7.93  | 21.99 | 29.56 |
| 8.40  | 100.00 | 12.43 | 24.10 | 27.33 |
| 9.20  | 0.50   | 94.96 | 3.00  | 87.00 |
| 9.20  | 10.45  | 74.59 | 5.11  | 78.18 |
| 9.20  | 20.40  | 56.99 | 7.22  | 70.02 |
| 9.20  | 30.35  | 42.15 | 9.33  | 62.51 |
| 9.20  | 40.30  | 30.09 | 11.44 | 55.65 |
| 9.20  | 50.25  | 20.79 | 13.55 | 49.45 |
| 9.20  | 60.20  | 14.26 | 15.66 | 43.90 |
| 9.20  | 70.15  | 10.49 | 17.77 | 39.01 |
| 9.20  | 80.10  | 9.50  | 19.88 | 34.77 |
| 9.20  | 90.05  | 11.27 | 21.99 | 31.18 |
| 9.20  | 100.00 | 15.81 | 24.10 | 28.25 |
| 10.00 | 0.50   | 98.28 | 3.00  | 94.99 |
| 10.00 | 10.45  | 77.95 | 5.11  | 85.47 |
| 10.00 | 20.40  | 60.39 | 7.22  | 76.60 |
| 10.00 | 30.35  | 45.60 | 9.33  | 68.39 |
| 10.00 | 40.30  | 33.57 | 11.44 | 60.83 |
| 10.00 | 50.25  | 24.32 | 13.55 | 53.93 |
| 10.00 | 60.20  | 17.83 | 15.66 | 47.68 |
| 10.00 | 70.15  | 14.11 | 17.77 | 42.09 |
| 10.00 | 80.10  | 13.16 | 19.88 | 37.15 |
| 10.00 | 90.05  | 14.98 | 21.99 | 32.86 |
| 10.00 | 100.00 | 19.56 | 24.10 | 29.23 |
